# Supplementary material for: Drought impact in the Bolivian Altiplano agriculture associated with the El Niño–Southern Oscillation using satellite imagery data
Source: Copernicus journal article supplement (doi:10.5194/nhess-21-995-2021), 2021-03-15
Supplement: Supplementary file 1 [file nhess-21-995-2021-supplement.zip]

Archive with 2 entries (2 files):
- script.txt
- nhess-21-995-2021-supplement-title-page.pdf
