# Supplementary material for: Drought impact in the Bolivian Altiplano agriculture associated with the El Niño–Southern Oscillation using satellite imagery data
Source: Copernicus journal article supplement (doi:10.5194/nhess-21-995-2021), 2021-03-15
Supplement: Supplementary file 1 [file nhess-21-995-2021-supplement.zip › nhess-21-995-2021-supplement-title-page.pdf]

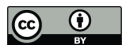

*Supplement of*

**Drought impact in the Bolivian Altiplano agriculture associated with the El Niño–Southern Oscillation using satellite imagery data**

**Claudia Canedo-Rosso et al.**

*Correspondence to:* Claudia Canedo-Rosso (canedo.clau@gmail.com)

- nhess-21-995-2021-supplement-title-page.pdf
- script.txt

The copyright of individual parts of the supplement might differ from the article licence.
